# Supplementary material for: Color tuning of Novel 2,1,3-Naphthothiadiazole and 2,1,3-Benzoselenadiazole based D-A-D′ Type dopants to realize highly efficient saturated red emission in non-polar solvents
Source: Royal Society of Chemistry journal article supplement (doi:10.1039/c1jm11204j), 2011-01-01
Supplement: c1jm11204j.pdf [file c1jm11204j.pdf]

# Color tuning of Novel 2,1,3-Naphthothiadiazole and 2,1,3-Benzoselenadiazole based D-A-D' Type dopants to realize highly efficient saturated red emission in non-polar solvents

Lei Chen,<sup>ab</sup> Lixiang Wang,<sup>\*a</sup> Xiabin Jing<sup>a</sup> and Fosong Wang<sup>a</sup>

## Supporting Information:

### 1. Synthesis of red MCs

All reagents were purchased from Aldrich, Acros, or Alfa and used directly without any further purification. Intermediates **1-6** were prepared as literatures [S1-S5].

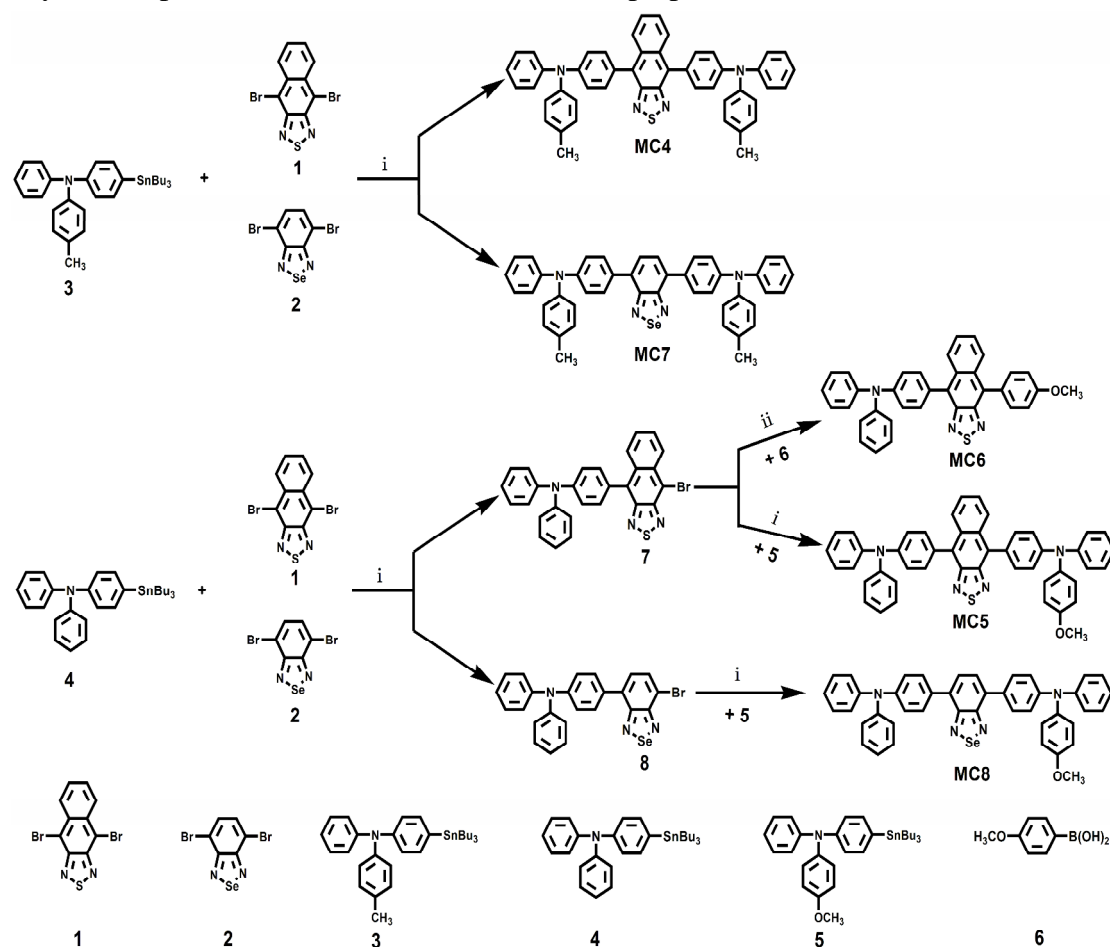

**Scheme S1** Synthetic routes of red model compounds and chemical structures of intermediates (**1-5**). (Reagents and conditions: i) Pd(PPh<sub>3</sub>)<sub>4</sub>, toluene, 100 °C; ii) Pd(PPh<sub>3</sub>)<sub>4</sub>, 2 M K<sub>2</sub>CO<sub>3</sub>, Aliquat 336, toluene, 90 °C.)

*4,9-Bis(4-(N-phenyl-N-(4-methylphenyl)amino)phenyl)-2,1,3-naphthothiadiazole (MC4)*: A mixture of 4,9-dibromo-2,1,3-naphthothiadiazole (**1**) (0.34 g, 0.80 mmol), tributyl(4-(N-phenyl-N-(4-methylphenyl)amino)phenyl)stannane (**3**) (1.65 g, 3.0 mmol), Pd(PPh<sub>3</sub>)<sub>4</sub> (0.06 g, 0.05 mmol) and toluene (40 mL) was heated to 100 °C and stirred in the dark for 24 hours. After workup, the mixture was poured to KF aqueous and stirred vigorously for 3 hours to remove the residual noxious organic stannic derivatives. After filtered, the filtrate was extracted with CH<sub>2</sub>Cl<sub>2</sub>, washed with brine and dried with anhydrous Na<sub>2</sub>SO<sub>4</sub>. The residue was purified by column chromatography (elute: petrol ether/dichloromethane 2/1) to afford a violet solid. Yield: 0.41 g (75.2%). <sup>1</sup>H NMR (300 MHz, CDCl<sub>3</sub>) δ (ppm): 8.12 (dd, 2H), 7.53 (d, 4H), 7.35 (dd, 2H), 7.31-7.24 (m, 12H), 7.21-7.08 (m, 8H), 7.06 (t, 2H), 2.34 (s, 6H). <sup>13</sup>C NMR (75 MHz, CDCl<sub>3</sub>) δ (ppm): 152.0, 148.3, 147.8, 145.2, 135.9, 134.2, 132.6, 130.5, 130.0, 129.7, 127.6, 126.2, 125.1, 123.4, 122.1, 21.3. MALDI-TOF (m/z): 700.3 [M<sup>+</sup>].

*4,7-Bis(4-(N-phenyl-N-(4-methylphenyl)amino)phenyl)-2,1,3-benzoselenadiazole (MC7)*: **MC7** was synthesized following the same procedure for **MC4** using 4,7-dibromo-2,1,3-benzoselenadiazole (**2**) instead of 4,9-dibromo-2,1,3-naphthothiadiazole (**1**) to give a violet solid. Yield: 0.66 g (73.6%). <sup>1</sup>H NMR (300 MHz, CDCl<sub>3</sub>) δ (ppm): 7.77 (d, 4H), 7.57 (s, 2H), 7.29-7.24 (m, 4H), 7.18-11 (m, 16H), 7.02 (t, 2H), 2.34 (s, 6H). <sup>13</sup>C NMR (75 MHz, CDCl<sub>3</sub>) δ (ppm): 160.3, 148.4, 148.1, 145.3, 134.4, 133.7, 131.7, 130.5, 129.6, 128.2, 125.9, 124.8, 123.3, 122.7, 21.0. MALDI-TOF (m/z): 698.2 [M<sup>+</sup>]

*4-(4-(Diphenylamino)phenyl)-9-bromo-2,1,3-naphthothiadiazole(7)*: Intermediate **7** was synthesized following the similar procedure for **MC4** using tributyl(4-(diphenylamino)phenyl)stanne (**4**) instead of tributyl(4-(N-phenyl-N-(4-methylphenyl)amino)phenyl)stannane (**3**) to give a deep red solid. Yield: 0.65 g (65.3%). <sup>1</sup>H NMR (300 MHz, CDCl<sub>3</sub>) δ (ppm): 8.49 (d, 1H), 8.15 (d, 1H), 7.61 (dd, 1H), 7.52 (d, 2H), 7.43 (dd, 1H), 7.39 (t, 4H), 7.31-7.28 (m, 6H), 7.11 (t, 2H).

*4-(4-(Diphenylamino)phenyl)-7-bromo-2,1,3-benzoselenadiazole(8)*: Intermediate **8** was synthesized following the similar procedure for **MC7** using tributyl(4-(diphenylamino)phenyl)stanne (**4**) instead of tributyl(4-(N-phenyl-N-(4-methylphenyl)amino)phenyl)stannane (**3**) to give a red solid. Yield: 0.47 g (87.6%). <sup>1</sup>H NMR (300 MHz, CDCl<sub>3</sub>) δ (ppm): 7.74 (d, 1H), 7.64 (d, 2H), 7.31 (d, 1H), 7.21 (t, 4H), 7.11-7.08 (m, 6H), 6.99 (t, 2H).

*4-(4-Methoxyphenyl)-7-(4-(diphenylamino)phenyl)-2,1,3-naphthothiadiazole(MC6)*: A mixture of 4-(4-(diphenylamino)phenyl)-9-bromo-2,1,3-naphthothiadiazole (**7**) (1.00 g, 2.00 mmol), 4-methoxyphenylboronic acid (0.46 g, 3.00 mmol), Pd(PPh<sub>3</sub>)<sub>4</sub> (0.02 mg, 0.02 mmol), toluene (20 mL) and 2 M K<sub>2</sub>CO<sub>3</sub> aqueous was kept stirred

under argon in the dark at 100 °C for 12 h. After cooling, the solution was extracted with dichloromethane, washed with water, and then dried with anhydrous Na<sub>2</sub>SO<sub>4</sub>. Evaporation of solvent and purification with silica column chromatography to afford a deep red solid. Yield: 0.93 g (86.2%). <sup>1</sup>H NMR (300 MHz, CDCl<sub>3</sub>) δ (ppm): 8.17 (dd, 1H), 8.07 (dd, 1H), 7.64 (d, 2H), 7.58 (d, 2H), 7.44-7.29 (m, 12H), 7.15 (d, 2H), 7.11 (t, 2H), 3.87 (s, 3H). <sup>13</sup>C NMR (75 MHz, CDCl<sub>3</sub>) δ (ppm): 159.9, 147.9, 132.9, 130.2, 129.8, 129.2, 127.6, 126.6, 125.6, 123.8, 122.6, 114.4, 55.79. MALDI-TOF (m/z): 535.2 [M<sup>+</sup>].

*4-(4-(Diphenylamino)phenyl)-9-(4-(N-phenyl-N-(4-methoxy)phenylamino)phenyl)-2,1,3-naphthothiadiazole (MC5)*: **MC5** was synthesized following the same procedure for **MC4** using 4-(4-(diphenylamino)phenyl)-9-bromo-2,1,3-naphthothiadiazole (**7**) and tributyl(4-(N-phenyl-N-(4-methoxy)phenylamino)phenyl)-stannane (**5**) instead of 4,9-dibromo-2,1,3-naphthothiadiazole (**1**) and tributyl(4-(N-phenyl-N-(4-methylphenyl)amino)phenyl)stannane (**3**) to give a violet solid. Yield: 0.52 g (77.3%). <sup>1</sup>H NMR (300 MHz, CDCl<sub>3</sub>) δ (ppm): 8.05 (dd, 2H), 7.45 (t, 4H), 7.31-13 (m, 19H), 7.01-6.92 (m, 4H), 6.84 (d, 2H), 3.76(s, 3H). <sup>13</sup>C NMR (75 MHz, CDCl<sub>3</sub>) δ (ppm): 157.0, 152.0, 148.2, 148.0, 132.6, 132.5, 130.3, 129.8, 129.7, 128.5, 127.6, 126.5, 125.5, 124.5, 123.8, 123.2, 122.7, 121.3, 115.4, 55.9. MALDI-TOF (m/z): 702.2 [M<sup>+</sup>].

*4-(4-(Diphenylamino)phenyl)-7-(4-(N-phenyl-N-(4-methoxy)phenylamino)phenyl)-2,1,3-benzoselenadiazole (MC8)*: **MC8** was synthesized following the same procedure for **MC4** using 4-(4-(diphenylamino)phenyl)-7-bromo-2,1,3-benzoselenadiazole (**8**) and tributyl(4-(N-phenyl-N-(4-methoxy)phenylamino)phenyl)-stannane (**5**) instead of 4,9-dibromo-2,1,3-naphthothiadiazole (**1**) and tributyl(4-(N-phenyl-N-(4-methylphenyl)amino)phenyl)stannane (**3**) to give a violet solid. Yield: 0.63 g (46.4%). <sup>1</sup>H NMR (300 MHz, CDCl<sub>3</sub>) δ (ppm): 7.78 (t, 4H), 7.58 (s, 2H), 7.29-7.06 (m, 21H), 6.88 (d, 2H), 3.82(s, 3H). <sup>13</sup>C NMR (75 MHz, CDCl<sub>3</sub>) δ (ppm): 160.3, 156.9, 148.6, 148.2, 148.0, 140.8, 134.5, 134.2, 131.3, 130.6, 129.8, 128.4, 128.2, 125.3, 124.2, 123.6, 123.3, 123.0, 122.0, 115.3, 55.9. MALDI-TOF (m/z): 700.2 [M<sup>+</sup>].

## 2. Photophysical characterizations of the MCs

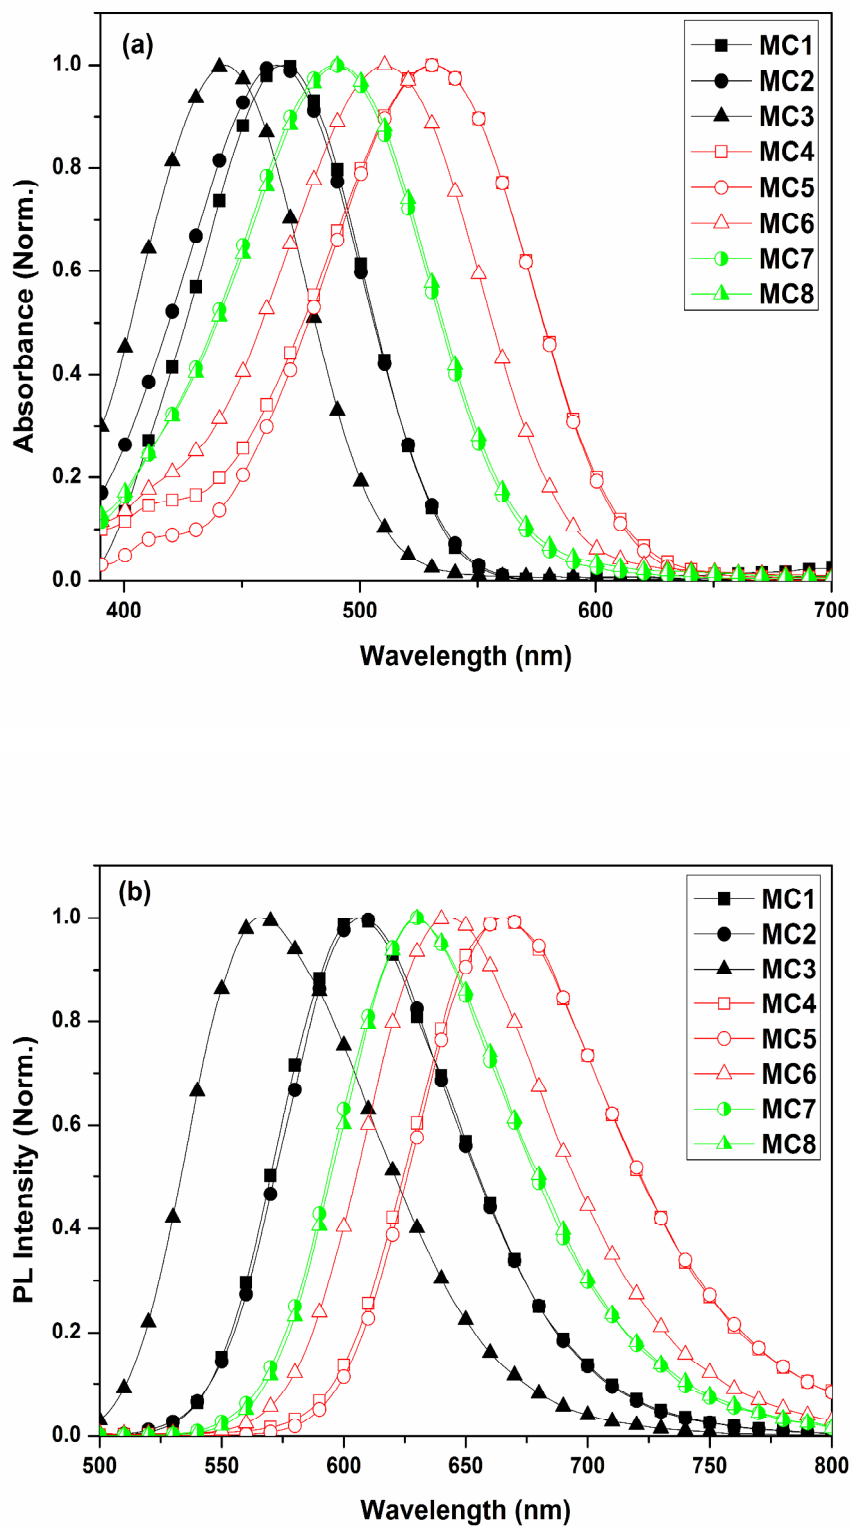

**Figure S1.** Absorption (a) and PL (b) spectra of red MCs in toluene solution

### 3. Electrochemical properties of the MCs

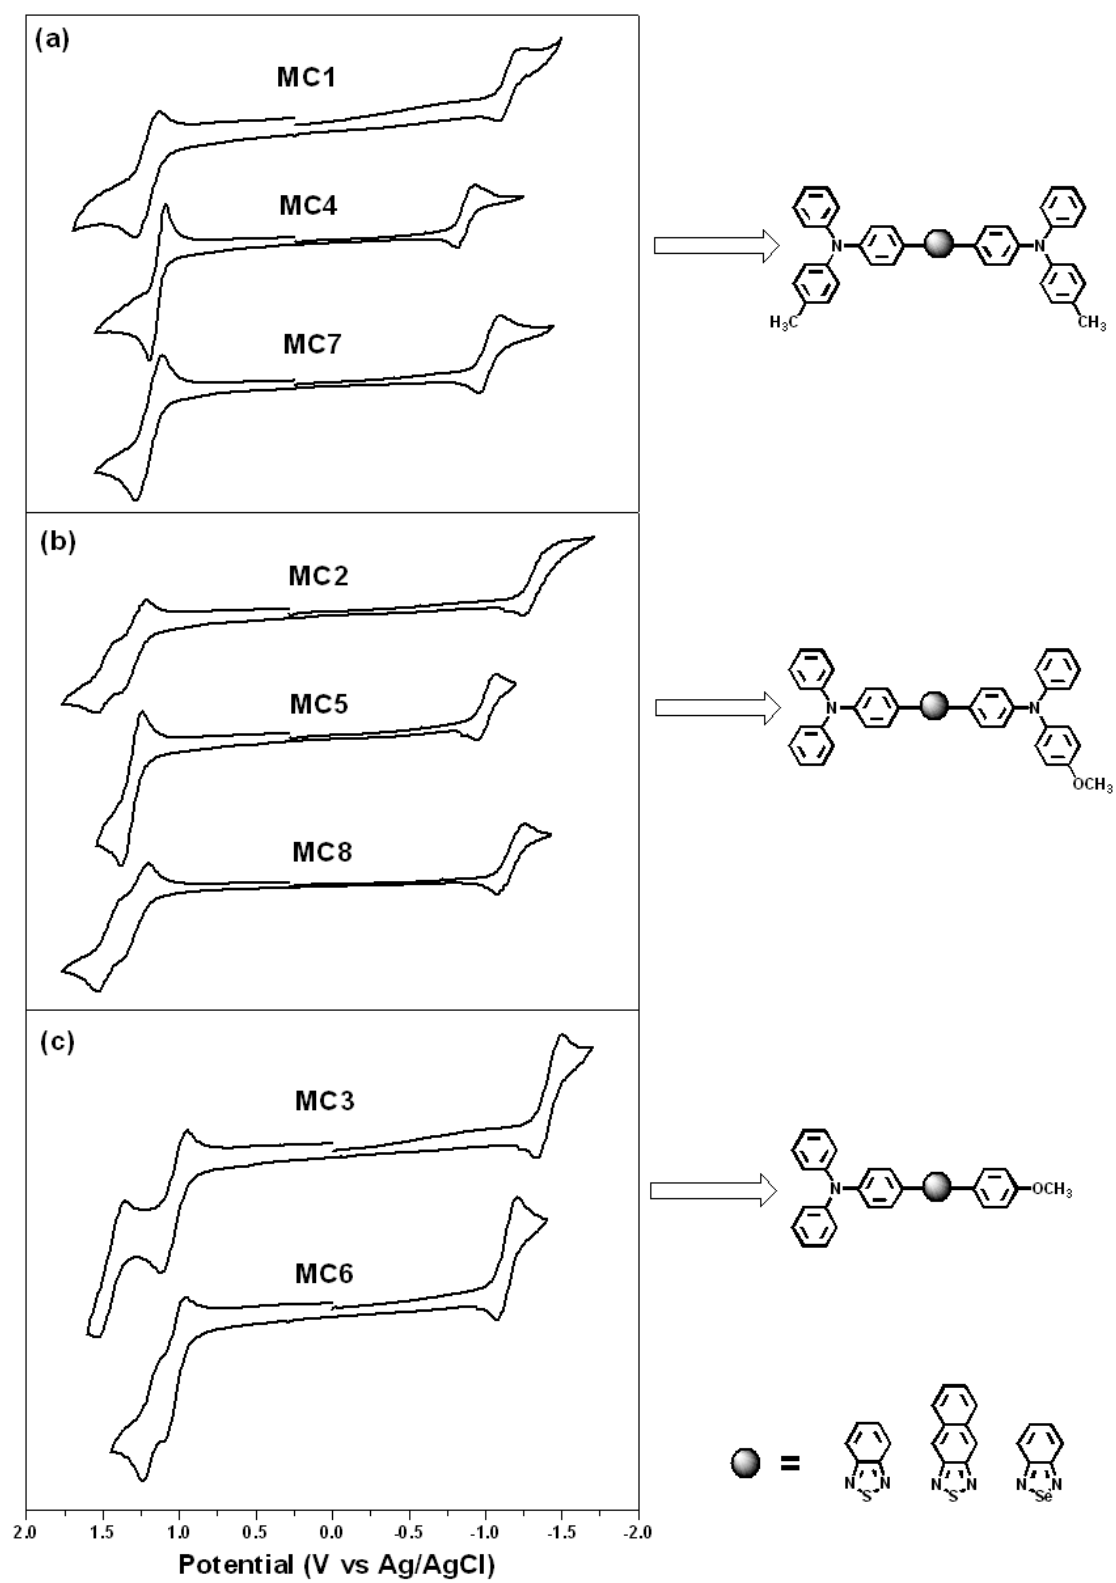

Figure S2. Cyclic voltammograms of the MCs

#### 4. Experimental section

*Measurement and characterization:*  $^1\text{H}$  NMR and  $^{13}\text{C}$  NMR spectra were recorded with a Bruker AV300 NMR spectrometer. MALDI-TOF was measured by a Bruker Daltonics Flexanalysis system. UV-Vis absorption spectra were measured by a Perkin-Elmer Lambda 35 UV/Vis spectrometer. PL spectra were recorded by a Perkin-Elmer LS50B spectrofluorometer.

The relative fluorescent quantum yields of MCs in solution were calculated using the following equation<sup>[S6]</sup>:  $\Phi_u = \Phi_s (A_s/A_u)(S_u/S_s)(n_u^2/n_s^2)$ . Here,  $\Phi$  is quantum yield,  $A$  is absorbance at the excitation wavelength,  $S$  is the integrated emission area across the band and  $n$  is the index of refraction of the solvent containing the unknown compound ( $n_u$ ) and the standard compound ( $n_s$ ).  $\lambda_{\text{ex}}$  is respectively 460 nm (for orange MCs) and 520 nm (for red MCs). The standard compound is Nile Red in 1,4-dioxane (0.68) for orange MC 1-3, and Nile Red in  $\text{CH}_3\text{CN}$  (0.78) for red MC 4-8.

Cyclic voltammograms of the MCs were recorded on an EG&G 283 (Princeton Applied Research) potentiostat/galvanostat system at room temperature in a solution of  $n\text{-Bu}_4\text{NClO}_4$  (0.10 M) in fresh  $\text{CH}_2\text{Cl}_2$  at a scan rate of 100 mV/s. A Pt wire and an Ag/AgCl electrode were used as the counter electrode and the reference electrode, a Pt disc as the working electrode respectively.

- [S1] P. Wei, L. Duan, D.Q. Zhang, J. Qiao, L. D. Wang, R. J. Wang, G. F. Dong and Y. Qiu, *J. Mater. Chem.*, 2008, **18**, 806.
- [S2] R. Q. Yang, R. Y. Tian, J. A. Yan, Y. Zhang, J. Yang, Q. Hou, W. Yang, C. Zhang, and Y. Cao, *Macromolecules*, 2005, **38**, 244.
- [S3] J. Liu, Q. G. Zhou, Y. X. Cheng, Y. H. Geng, L. X. Wang, D. G. Ma, X. B. Jing and F. S. Wang, *Adv. Funct. Mater.*, 2006, **16**, 957.
- [S4] J. Liu, L. Chen, S.Y. Shao, Z. Y. Xie, Y. X. Cheng, Y. H. Geng, L. X. Wang, X. B. Jing, F. S. Wang, *J. Mater. Chem.*, 2008, **18**, 319.
- [S5] L. Pasumansky, D. Haddenham, J. W. Clary, G. B. Fisher, C. T. Goralski and B. Singaram, *J. Org. Chem.*, 2008, **73**, 1898.
- [S6] D. F. Eaton, *Pure & Appl. Chem.*, 1988, **60**, 1107.
